# Supplementary material for: SNORA33 promotes clear cell renal cell carcinoma development and resistance to sunitinib through triggering the JAK/STAT pathway
Source: Research Square preprint supplement (doi:10.21203/rs.3.rs-6241591/v1), 2025-05-06
Supplement: Supplementary file 1 [file 09427b4bf481a9164d6ce0c7.docx]

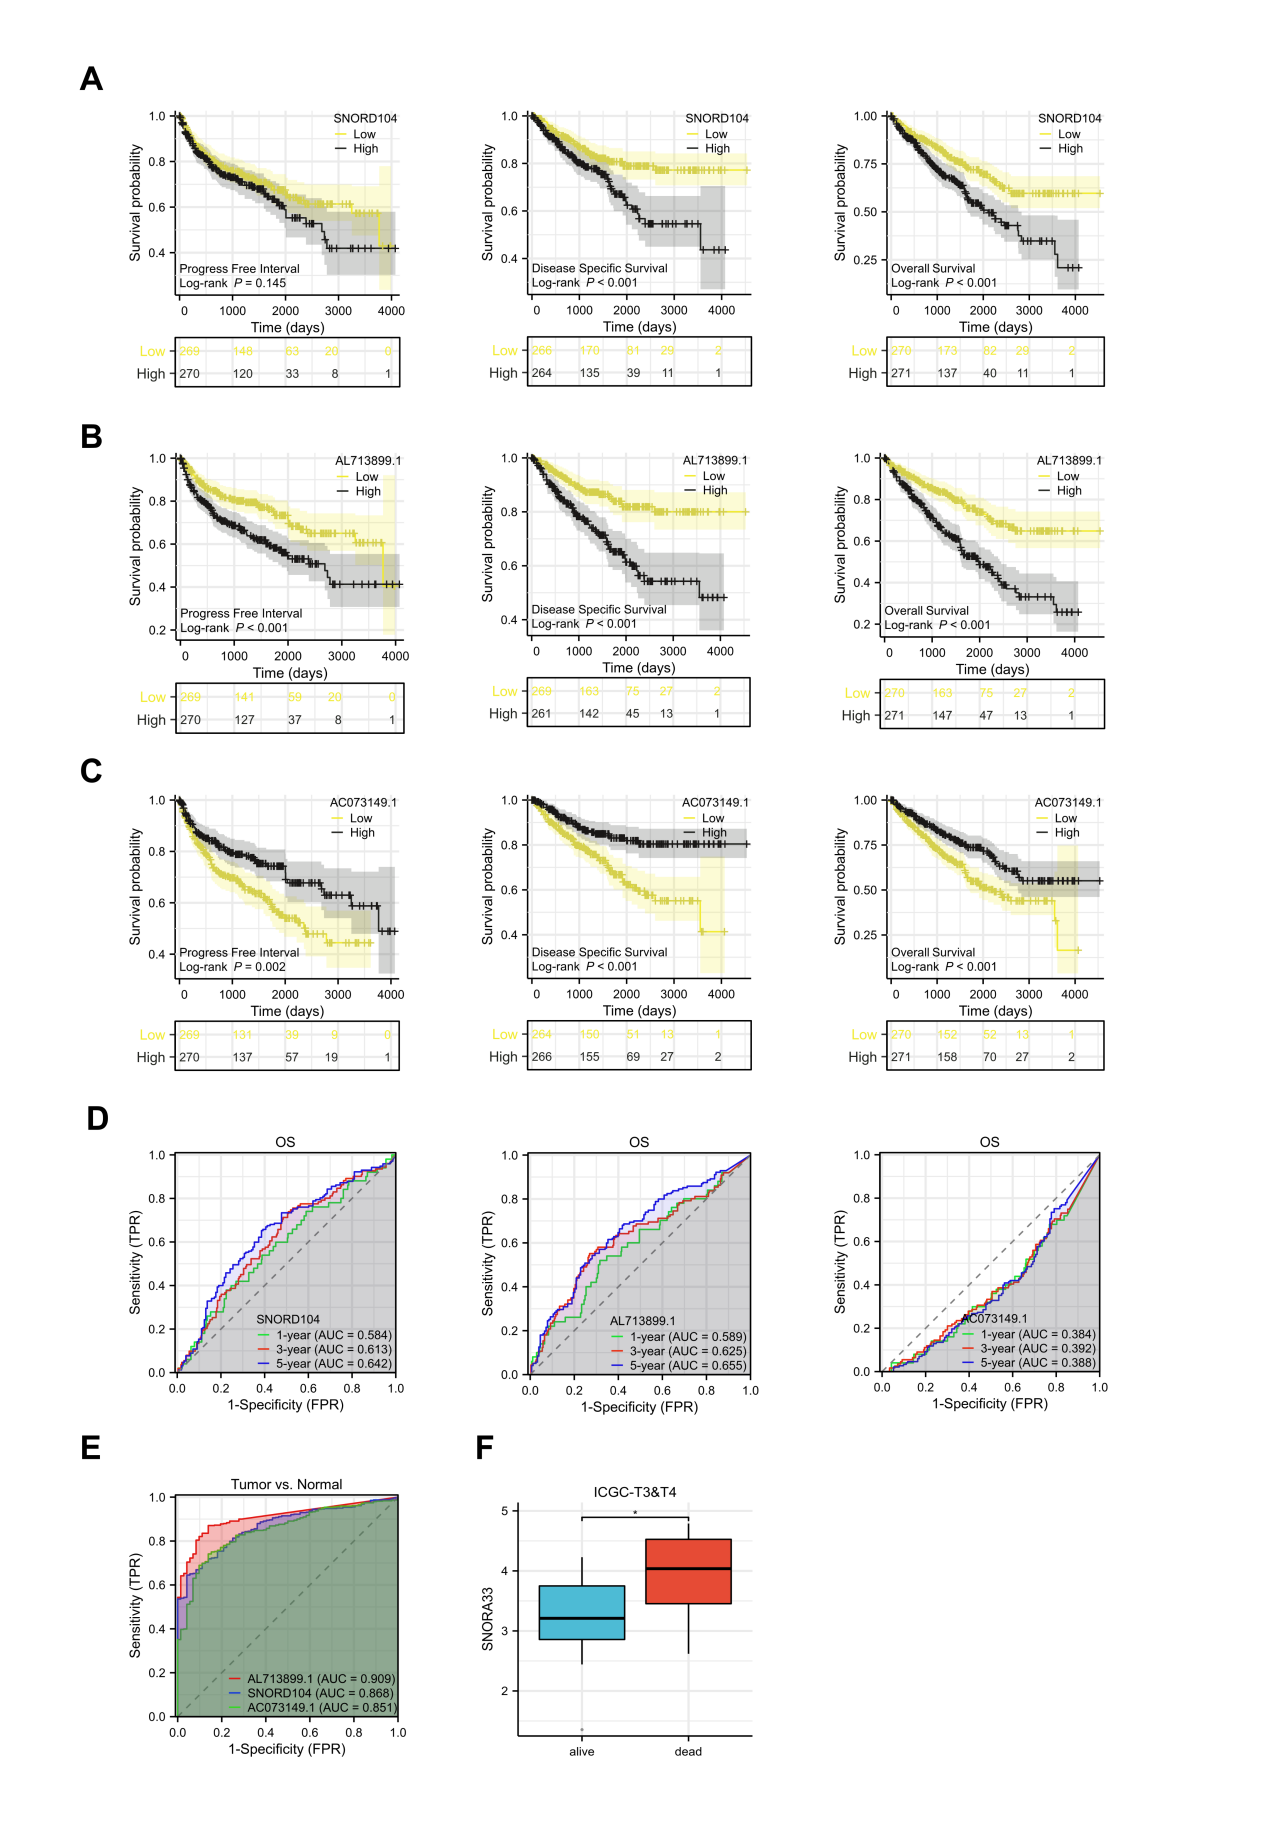


**Supplemental figure 1.** Stratified prognostic analysis of the SNORD104, AL713899.1, AC073149.1 expression.


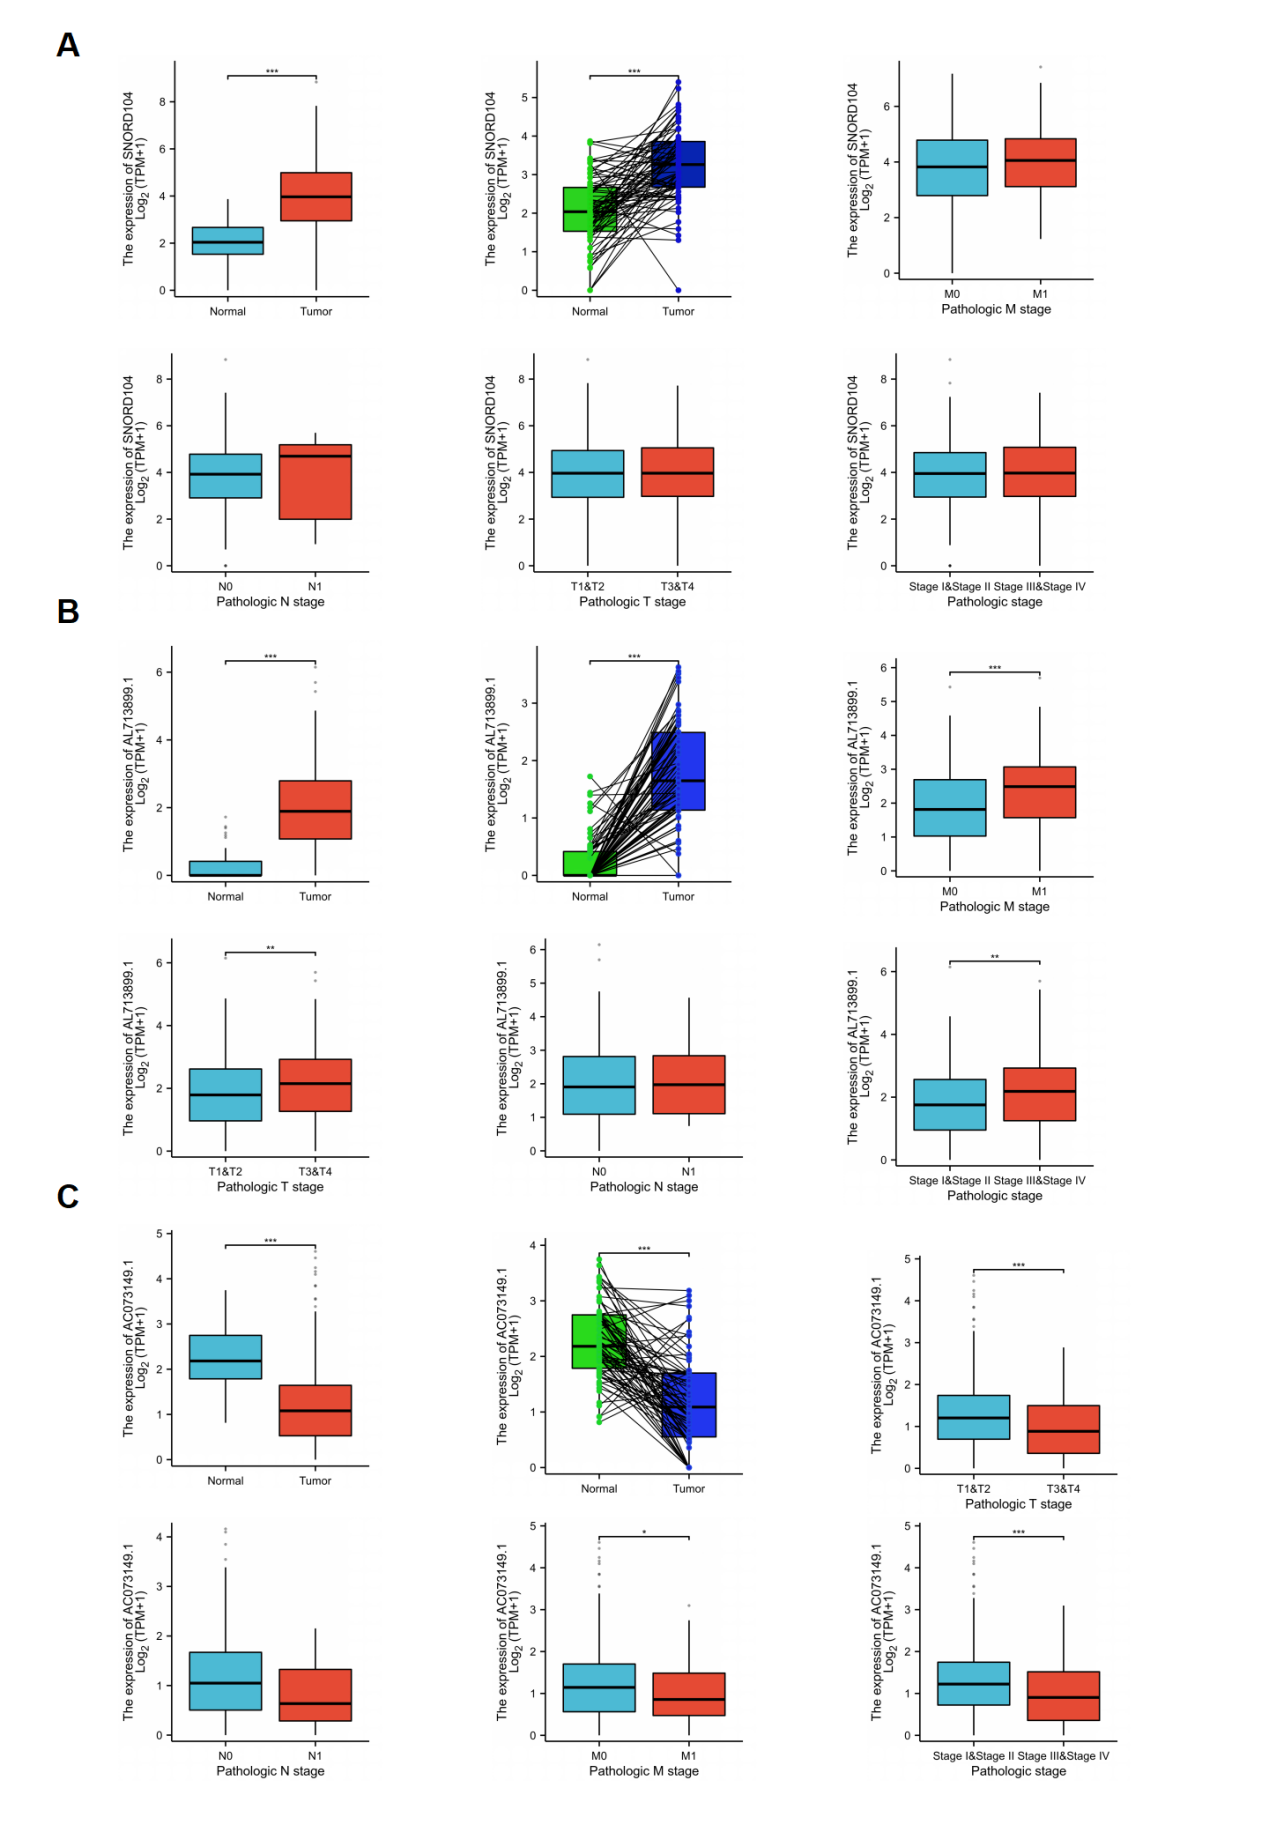
**Supplemental figure 2.** Box plot revealing the relationship between SNORD104, AL713899.1, AC073149.1 genes expression and different clinical indicators.


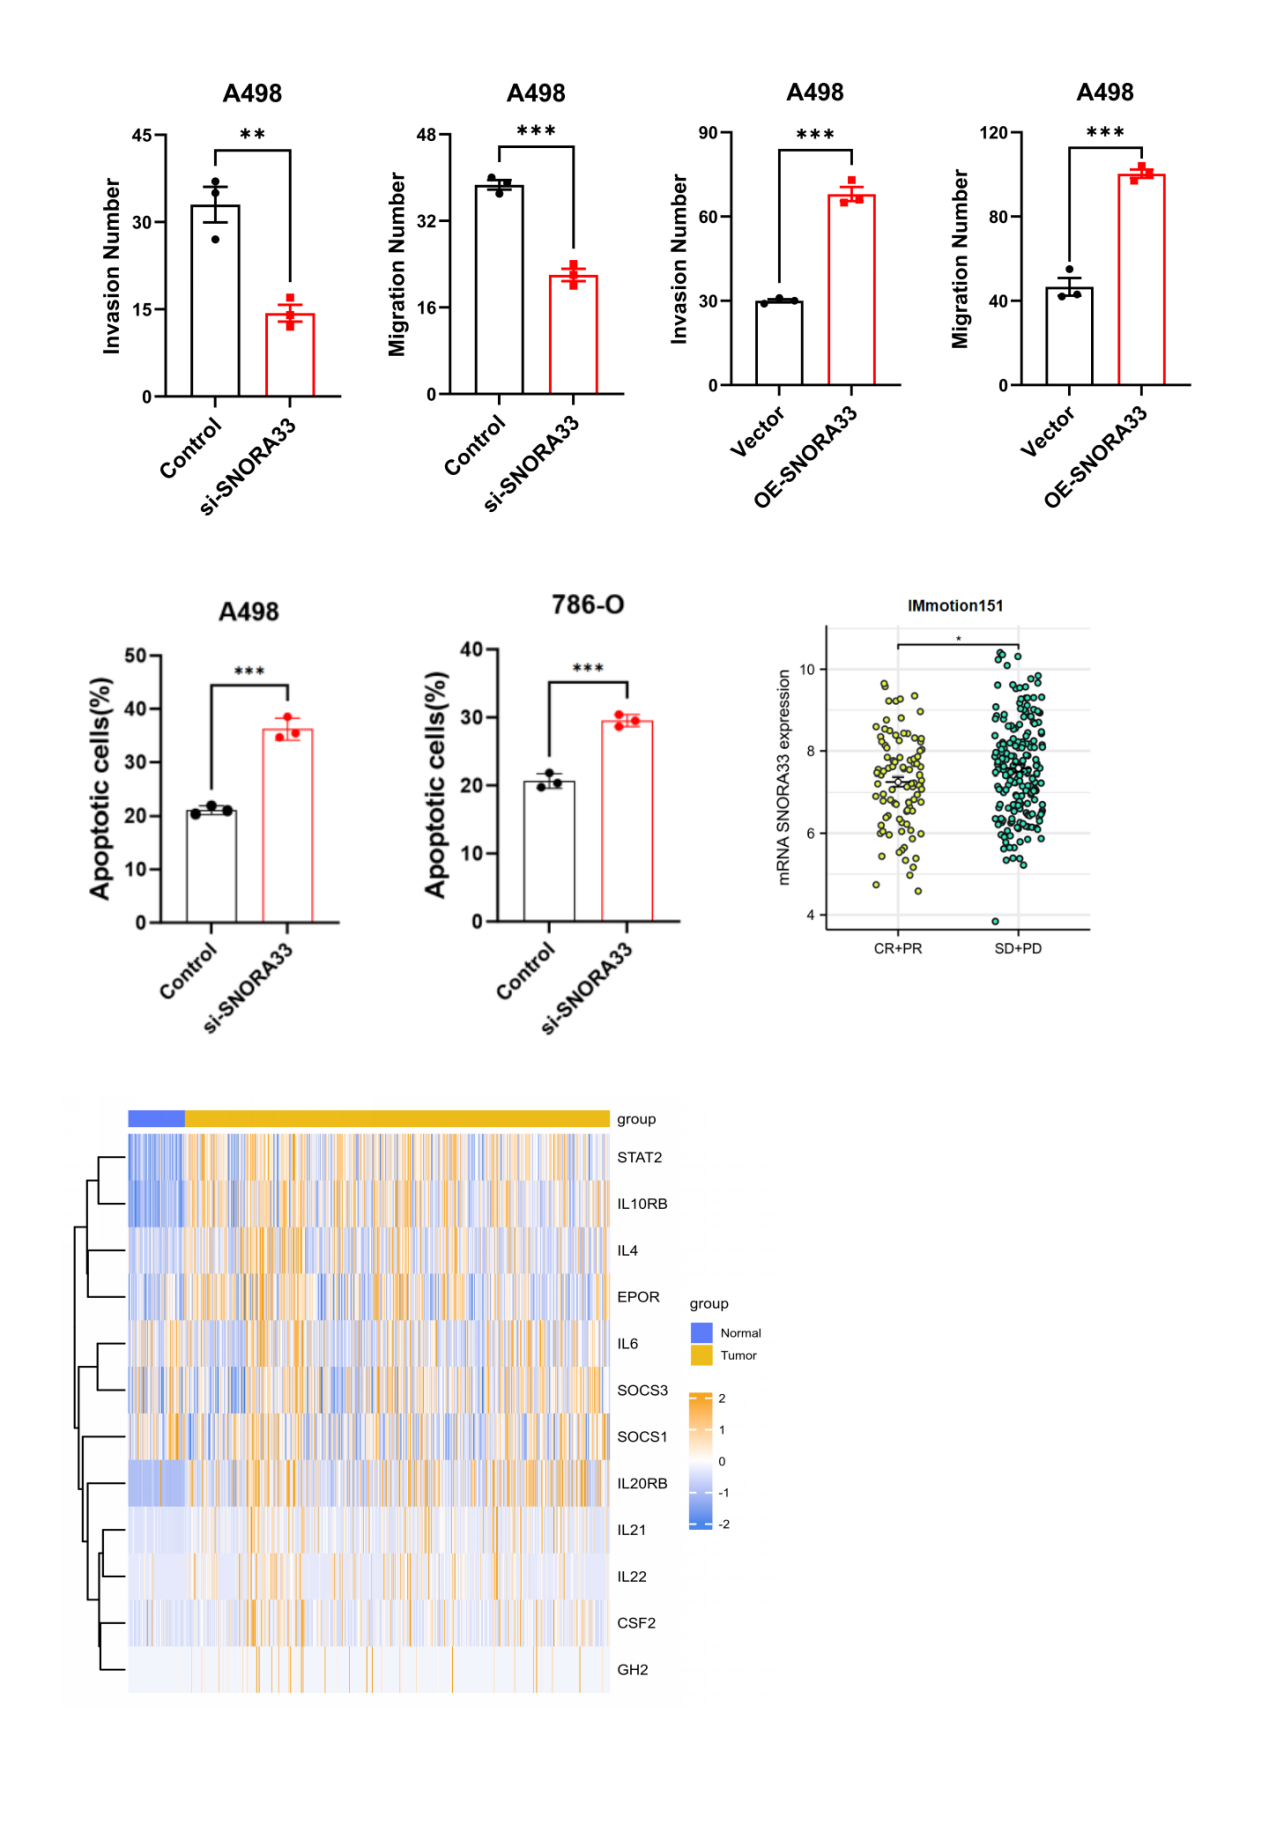
**Supplemental figure 3.** Key:CR, complete response; PR, partial response; PD, progressive disease; SD, stable disease.
