# Supplementary material for: SNORA33 promotes clear cell renal cell carcinoma development and resistance to sunitinib through triggering the JAK/STAT pathway
Source: Research Square preprint supplement (doi:10.21203/rs.3.rs-6241591/v1), 2025-05-06
Supplement: Supplementary file 2 [file 1d686abdc40a2f441392d64f.docx]

**Table S1.** Primers for qRT-PCR in this study.

| **Gene** | **Sequence (5’-3’)** |
| --- | --- |
| GAPDH-F  GAPDH-R  SNORA33-F  SNORA33-R | GCACCGTCAAGGCTGAGAAC  TGGTGAAGACGCCAGTGGA  AGCCAATGAATCTGCTTACCTG  CAGGGACCTTAACGACTTCAATG |

**Table S2.** SiRNA and vector sequences used in this study.

| Gene | Sequence (5′-3′) |
| --- | --- |
| si-SNORA33-1 | CUUACCUGAUUGUGUUUGUTTACAAACACAAUCAGGUAAGTT |
| si-SNORA33-2  SNORA33-nc | CGAGCCUUAAGGACAUUGATTUCAAUGUCCUUAAGGCUCGTT  AAGCCAGCCAATGAATCTGCTTACCTGATTGTGTTTGTGCAGACATACTTTAAA  AACTGGCAATAGTAAAGCCATGTTACGAGCCTTAAGGACATTGAAGTCGTTAA  GGTCCCTGAGAATGGCTATAACAAAT |
